# Supplementary material
Source: ML conference proceedings conference paper supplement (https://www.ecva.net/papers/eccv_2024/papers_ECCV/html/7862_ECCV_2024_paper.php)
Supplement: Supplementary file 1 [file 07862-supp.pdf]

# LNL+K: Enhancing Learning with Noisy Labels Through Noise Source Knowledge Integration Supplementary

Siqi Wang and Bryan A. Plummer

Boston University, Boston MA 02215, USA  
{siqiwang, bplum}@bu.edu

## 1 LNL+K baseline methods

For the convenience of formulating the following equations, recall the notations we defined in Section 3 in the main paper. Dataset  $D = \{(x_i, \tilde{y}_i)_{i=1}^n \in R^d \times K\}$ , where  $K = \{1, 2, \dots, k\}$  is the categorical label for  $k$  classes.  $(x_i, \tilde{y}_i)$  denotes the  $i$ -th example in the dataset.  $\{\tilde{y}_i\}_{i=1}^n$  might include noisy labels and the true labels  $\{y_i\}_{i=1}^n$  are unknown. Noise transition probability matrix  $P_{k \times k}$ , where  $P_{ij}$  refers to the probability that a sample in class  $i$  is mislabeled as class  $j$ . A set of label pairs  $LP = \{(i, j) | i, j \in K\}$ , where  $(i, j)$  indicates that samples in class  $i$  are more likely to be mislabeled as class  $j$ . noise source knowledge  $D_{c-ns}$  represents the set of noise source labels of category  $c$ . *I.e.*,  $D_{c-ns} = \{i | i \in K \wedge (P_{ic} > 0 \vee (i, c) \in LP)\}$ .

### 1.1 CRUST<sup>+k</sup>

The key idea of CRUST [11] is from the neural network Jacobian matrix containing all its first-order partial derivatives. It is proved in their work that the neural network has a low-rank Jacobian matrix for clean samples. In other words, data points with clean labels in the same class often have similar gradients clustered closely together. CRUST [11] is a feature-based method and this approach can be summarized with settings in Section 3.1. The feature used for selection is the pairwise gradient distance within the class:  $g(X_c) = \{d_{x_i x_j}(\mathcal{W}) | x_i, x_j \in X_c\}$ , where  $d_{x_i x_j}(\mathcal{W}) = \|\nabla L(\mathcal{W}, x_i) - \nabla L(\mathcal{W}, x_j)\|_2$ ,  $\mathcal{W}$  is the network parameters and  $L(\mathcal{W}, x_i) = \frac{1}{2} \sum_{x_i \in D} (y_i - f_{\theta}(\mathcal{W}, x_i))^2$ . CRUST [11] needs an additional parameter  $\beta$  to control the size of the clean selection set  $X'_c$ . Given  $\beta$ , the sample  $x_i$  is selected as clean if  $\|X'_c\| = \beta$  ( $\|X'_c\|$  is the size of set  $X'_c$ ) and  $x_i \in X'_c$ , where  $\sum g(X'_c)$  has the minimum value. *i.e.*, the selected clean subset  $X'_c$  has the most similar gradients clustered together. Thus, we can summarize the similarity metric  $M$  for  $p(c|x_i)$  as:

$$\begin{aligned}
 M(x_i, \phi_c, \beta) &= 1 \leftrightarrow \exists X'_c \subset X_c \wedge \|X'_c\| = \beta, \\
 s.t. \ x_i &\in X'_c \wedge (\forall \|X''_c\| = \beta \wedge X''_c \subset X_c, \\
 &\sum g(X'_c) \leq \sum g(X''_c)), \tag{1}
 \end{aligned}$$

otherwise  $M(x_i, \phi_c, \beta) = 0$ . Thus, we can get the propositional logic of CRUST:

$$y_i = c \leftrightarrow \tilde{y}_i = c \wedge p(c|x_i) = 1 \leftrightarrow M(x_i, \phi_{\tilde{y}_i}, \beta) = 1. \quad (2)$$

To adapt CRUST to CRUST<sup>+k</sup> with noise source distribution knowledge. from Eq.2 in the main paper, we have

$$\begin{aligned} \tilde{y}_i = c \wedge y_i \neq c &\leftrightarrow p(c|x_i) \leq \max(\{p(c_n|x_i)|c_n \in D_{c-ns}\}) \\ &\leftrightarrow \exists c_n \in D_{c-ns} \text{ s.t. } p(c_n|x_i) \geq p(c|x_i) \\ &\leftrightarrow \exists c_n \in D_{c-ns} \text{ s.t. } p(c_n|x_i) = 1. \end{aligned} \quad (3)$$

To get  $p(c_n|x_i)$ , we first mix  $x_i$  with all the samples in  $X_{c_n}$ , *i.e.*,  $X_{c_n+} = \{x_i\} \cup X_{c_n}$ . Then apply CRUST on this mix set, *i.e.*, calculate the loss towards label  $c_n$  and select the clean subset  $X'_{c_n+}$ . if  $x_i \in X'_{c_n+}$ , then  $p(c_n|x_i) = 1$ . Here is the formulation of CRUST<sup>+k</sup>, we modify  $L(\mathcal{W}, x_i)$  to  $L(\mathcal{W}, x_i, c) = \frac{1}{2} \sum_{x_i \in D} (c - f_\theta(\mathcal{W}, x_i))^2$ , where we calculate the loss to any certain categories, not limited to the loss towards the label. Similarly, we have  $d_{x_i x_j}(\mathbf{W}, c) = \|\nabla L(\mathcal{W}, x_i, c) - \nabla L(\mathcal{W}, x_j, c)\|_2$ ,  $g(X_{c_n+}, c_n) = \{d_{x_i x_j}(\mathbf{W}, c_n)|x_i, x_j \in X_{c_n+}\}$ . We use  $\gamma$  to represent the subset size of  $X_{c_n+}$ , which is decided by  $\beta$  and noise source distribution. Finally, we get the similarity metric  $M(x_i, \phi_{c_n+}, \gamma)$  as:

$$\begin{aligned} M(x_i, \phi_{c_n+}, \gamma) = 1 &\leftrightarrow \exists X'_{c_n+} \subset X_{c_n+} \wedge \|X'_{c_n+}\| = \gamma, \\ &\text{s.t. } x_i \in X'_{c_n+} \wedge (\forall \|X''_{c_n+}\| = \gamma \wedge X''_{c_n+} \subset X_{c_n+}, \\ &\quad \sum g(X'_{c_n+}, c_n) \leq \sum g(X''_{c_n+}, c_n)), \end{aligned} \quad (4)$$

otherwise  $M(x_i, \phi_{c_n+}, \gamma) = 0$ . Combining Eq.2 in the main paper, Eq.2, and Eq.4,  $p(c|x_i)$  of CRUST<sup>+k</sup> method is:

$$\begin{aligned} y_i = c &\leftrightarrow \tilde{y}_i = c \wedge (\forall c_n \in D_{c-ns}, p(c_n|x_i) < p(c|x_i)) \\ &\leftrightarrow \tilde{y}_i = c \wedge (\forall c_n \in D_{c-ns}, p(c_n|x_i) = 0) \\ &\leftrightarrow \tilde{y}_i = c \wedge (\forall c_n \in D_{c-ns}, M(x_i, \phi_{c_n+}, \gamma) = 0). \end{aligned} \quad (5)$$

## 1.2 FINE<sup>+k</sup>

Filtering Noisy instances via their Eigenvectors(*FINE*) [6] selects clean samples with the feature-based method. Let  $f_{\theta^*}(x_i)$  be the feature extractor output and  $\Sigma_c$  be the gram matrix of all features labeled as category  $c$ . The alignment is defined as the cosine distance between feature  $\overrightarrow{f_{\theta^*}(x_i)}$  and  $\overrightarrow{c}$ , which is the eigenvector of the  $\Sigma_c$  and can be treated as the feature representation of category  $c$ . FINE fits a Gaussian Mixture Model (GMM) on the alignment distribution to divide samples to clean and noisy groups - the clean group has a larger mean value, which refers to a better alignment with the category feature representation. In summary, feature mapping function  $g(x_i, c) = \langle \overrightarrow{f_{\theta^*}(x_i)}, \overrightarrow{c} \rangle$ , and mixture of Gaussian distributions  $\phi_c = \mathcal{N}_{clean} + \mathcal{N}_{noisy} = \mathcal{N}(\mu_{g(X_{c-clean})}, \sigma_{g(X_{c-clean})}) +$

$\mathcal{N}(\mu_{g(X_{c-noisy})}, \sigma_{g(X_{c-noisy})})$ , where  $\mu_{g(X_{c-clean})} > \mu_{g(X_{c-noisy})}$ . The similarity metric

$$M(x_i, \phi_c) = \begin{cases} 1 & : \mathcal{N}_{clean}(g(x_i, c)) > \mathcal{N}_{noisy}(g(x_i, c)) \\ 0 & : \mathcal{N}_{clean}(g(x_i, c)) \leq \mathcal{N}_{noisy}(g(x_i, c)). \end{cases}$$

Thus, we have

$$y_i = c \leftrightarrow \tilde{y}_i = c \wedge p(c|x_i) = 1 \leftrightarrow M(x_i, \phi_{\tilde{y}_i}) = 1. \quad (6)$$

Next, we show our design of FINE<sup>+k</sup> with noise source distribution knowledge. The key difference between FINE and FINE<sup>+k</sup> is that we use the alignment score of the noise source class. For a formal description of FINE<sup>+k</sup>, We define  $g_k(x_i, c, c_n) = g(x_i, c) - g(x_i, c_n)$ . Similar to FINE, FINE<sup>+k</sup> fits a GMM on  $g_k(X_c, c, c_n)$ , so we have  $g_k(X_c, c, c_n) \sim \phi_{k-\{c+c_n\}} = \mathcal{N}_{close-c} + \mathcal{N}_{close-c_n}$ , where  $\mu_{close-c} > \mu_{close-c_n}$ . This can be interpreted in the following way: Samples aligning better with category  $c$  should have larger  $g(x_i, c)$  values and smaller  $g(x_i, c_n)$  values according to the assumption, thus the greater the  $g_k(x_i, c, c_n)$ , the closer to category  $c$ , vice versa, the smaller the  $g_k(x_i, c, c_n)$ , the closer to category  $c_n$ . Then we have

$$\begin{aligned} & M(x_i, \phi_{k-\{c+c_n\}}) = 1 \\ \leftrightarrow & \mathcal{N}_{close-c}(g_k(x_i, c, c_n)) > \mathcal{N}_{close-c_n}(g_k(x_i, c, c_n)) \end{aligned} \quad (7)$$

otherwise  $M(x_i, \phi_{k-\{c+c_n\}}) = 0$ . By combining with Eq.2 in the main paper, we have

$$\begin{aligned} y_i = c \leftrightarrow & \tilde{y}_i = c \wedge (\forall c_n \in D_{c-ns}, p(c|x_i) > p(c_n|x_i)) \\ \leftrightarrow & y_i = c \wedge (\forall c_n \in D_{c-ns}, M(x_i, \phi_{k-\{c+c_n\}}) = 1). \end{aligned} \quad (8)$$

### 1.3 SFT<sup>+k</sup>

SFT [14] detects noisy samples according to predictions stored in a memory bank  $\mathcal{M}$ .  $\mathcal{M}$  contains the last  $T$  epochs' predictions of each sample. A sample  $x_i$  is detected as noisy if a fluctuation event occurs, *i.e.*, the sample classified correctly at the previous epoch  $t_1$  is misclassified at  $t_2$ , where  $t_1 < t_2$ . The occurrence of the fluctuation event can be formulated as  $fluctuation(x_i, y_i) = 1$ , otherwise  $fluctuation(x_i, y_i) = 0$  *i.e.*,

$$\begin{aligned} & fluctuation(x_i, y_i) = 1 \\ \leftrightarrow & \exists t_1, t_2 \in \{t - T, \dots, T\} \wedge t_1 < t_2 \\ & s.t. f_\theta(x_i)^{t_1} = \tilde{y}_i \wedge f_\theta(x_i)^{t_2} \neq \tilde{y}_i, \end{aligned} \quad (9)$$

where  $f_\theta(x_i)^{t_1}$  represents the prediction of  $x_i$  at epoch  $t_1$ . SFT is a probability-distribution-based approach and can fit our probabilistic model as follows. The propositional logic of SFT is,

$$p(c|x_i) = \begin{cases} 1 & : \tilde{y}_i = c \wedge fluctuation(x_i, \tilde{y}_i) = 0 \\ 0 & : otherwise. \end{cases} \quad (10)$$

*I.e.*, SFT<sup>+k</sup> applies the noise source distribution knowledge to SFT by stricting the constraints of fluctuation. The fluctuation events only occur when the previous correct prediction is misclassified as the noise source label. Thus, we define SFT<sup>+k</sup> fluctuation as,

$$\begin{aligned} & \text{fluctuation}(x_i, y_i, D_{y_i-ns}) = 1 \\ \leftrightarrow & \exists c_n \in D_{y_i-ns}, \exists t_1, t_2 \in \{t - T, \dots, T\} \wedge t_1 < t_2, \\ & \text{s.t. } f_\theta(x_i)^{t_1} = y_i \wedge f_\theta(x_i)^{t_2} = c_n. \end{aligned} \quad (11)$$

Combining Eq.2 in the main paper, Eq. 10 and Eq. 11, SFT<sup>+k</sup> detects  $x_i$  with clean label  $y_i = \tilde{y}_i = c$  with  $p(c|x_i)$  as:

$$\begin{aligned} & y_i = c \\ \leftrightarrow & \tilde{y}_i = c \wedge p(c|x_i) > \max(\{p(c_n|x_i)|c_n \in D_{c-ns}\}) \\ & \leftrightarrow \tilde{y}_i = c \wedge p(c|x_i) = 1 \\ \leftrightarrow & \tilde{y}_i = c \wedge \text{fluctuation}(x_i, \tilde{y}_i, D_{\tilde{y}_i-ns}) = 0. \end{aligned} \quad (12)$$

#### 1.4 UNICON<sup>+k</sup>

UNICON [5] estimate the clean probability by using Jensen-Shannon divergence (JSD)  $d_i$ , which is a measure of distribution disagreement. JSD is defined by KLD, which is the Kullback-Leibler divergence function. We follow the same JSD definition as UNICON in the adaptation method. Given the predicted probability  $p_i$  and label  $\tilde{y}_i$ ,  $d_i = JSD(\tilde{y}_i, p_i)$ . The value of  $d_i$  ranges from 0 to 1 and the smaller the  $d_i$  is, the higher the probability of  $\tilde{y}_i$  being clean. A cutoff value  $d_{cutoff}$  is used to select clean samples. To summarize, the propositional logic of UNICON is,

$$\begin{aligned} & p(c|x_i) = 1 - JSD(x_i, y_i) \\ \leftrightarrow & y_i = c \wedge JSD(x_i, y_i) < d_{cutoff} \end{aligned} \quad (13)$$

otherwise  $p(c|x_i) = 0$ . Then noise source knowledge is integrated with our unified framework:

$$\begin{aligned} & y_i = c \leftrightarrow \tilde{y}_i = c \wedge p(c|x_i) > \max(\{p(c_n|x_i)|c_n \in D_{c-ns}\}) \\ \leftrightarrow & \tilde{y}_i = c \wedge (\forall c_n \in D_{c-ns}, JSD(x_i, \tilde{y}_i) < JSD(x_i, c_n)). \end{aligned} \quad (14)$$

#### 1.5 DISC<sup>+k</sup>

DISC [8] employs weak and strong augmentations on each single noisy labeled data and divides samples into *Clean*, *Hard*, and *Purified* sets according to the prediction confidences on the two-augmentation views. The clean set is determined with the prediction confidence in weak view  $Conf_w$ , confidence in strong view  $Conf_s$ , and dynamic instance specific thresholds ( $DIST$ ) for weak and strong views  $\tau_w$  and  $\tau_s$ . The  $DIST$  is defined as,

$$\tau(x, t) = \lambda\tau(t - 1) + (1 - \lambda) \max(\{Conf(c, x)|c \in K\}, \tau(0) = 0. \quad (15)$$

where  $Conf(c, x)$  represents the prediction confidence in sample  $x$  for class  $c$ . Then the clean set selected at time  $t$  of DISC can be defined as,

$$C(t) = \{x_i | Conf_w(\tilde{y}_i, x_i) > \tau_w(x_i, t)\} \cap \{x_i | Conf_s(\tilde{y}_i, x_i) > \tau_s(x_i, t)\}. \quad (16)$$

According to the Eq.1 in the main paper, sample  $x_i$  is clean at time  $t$  in DISC is detected with,

$$y_i = c \leftrightarrow \tilde{y}_i = c \wedge (Conf_w(\tilde{y}_i, x_i) > \tau_w(x_i, t) \wedge Conf_s(\tilde{y}_i, x_i) > \tau_s(x_i, t)). \quad (17)$$

DISC<sup>+k</sup> introduces class-wise comparisons and makes adaptations to the instance-specific threshold. Instead of taking the maximum confidence from all the class (*i.e.*  $\max(\{Conf(c, x) | c \in K\})$ ), DISC<sup>+k</sup> only selects maximum from the labeled class and noise source classes. To be specific, we have,

$$\tau^{+k}(x, \tilde{y}, t) = \lambda\tau(t-1) + (1-\lambda) \max(\{Conf(c, x) | c \in D_{\tilde{y}-ns}\} \cup \{Conf(\tilde{y}, x)\}). \quad (18)$$

According to the Eq.2 in the main paper, the noise source knowledge is integrated as,

$$y_i = c \leftrightarrow \tilde{y}_i = c \wedge (Conf_w(\tilde{y}_i, x_i) > \tau_w^{+k}(x_i, \tilde{y}_i, t) \wedge Conf_s(\tilde{y}_i, x_i) > \tau_s^{+k}(x_i, \tilde{y}_i, t)). \quad (19)$$

## 2 Datasets

### 2.1 CIFAR datasets [7] with synthesized noise

**Dominant noise** There are *recessive* and *dominant* classes in dominant noise. For CIFAR-10 [7], category index of the last 5 are *recessive* classes and the first five are *dominant* classes. In other words, category index 6-10 samples might be mislabeled as label index 1-5. Different numbers of samples are mixed for different noise ratios so that the dataset is still balanced after mislabeling. Table 1 shows the number of samples per category for each noise ratio. Notably, the dataset is balanced after the mislabeling. In each recessive class, there are multiple noise sources, with all dominant classes serving as the noise sources. To illustrate, in CIFAR-10 [7], classes 6-10 are considered recessive, and instances of these classes might be incorrectly labeled as dominant classes 1-5. To maintain balance after mislabeling, we adopt an unbalanced sampling approach to construct the dataset. For instance, with a noise ratio of 0.5 in the CIFAR-10 dataset, we sample 1250 instances for each *dominant* class and 3750 instances for each *recessive* class. After mislabeling 1250 samples to the *dominant* class for each *recessive* class, there are 2500 samples in each class.

**Asymmetric noise.** Labels are corrupted to visually similar classes. Pair  $(C_1, C_2)$  represents the samples in class  $C_1$  and  $C_2$  are possibly mislabeled as each other. Noise ratios in the experiments are only the noise ratio in class pairs, *i.e.* not the overall noise ratio. Here are the class pairs of CIFAR-10 and CIFAR-100 [7] for asymmetric noise. **CIFAR-10** [7] (trucks, automobiles), (cat, dog), (horse, deer). **CIFAR-100** [7] (beaver, otter), (aquarium fish, flatfish), (poppies, roses), (bottles, cans), (apples, pears), (chair, couch), (bee, beetle), (lion, tiger), (crab, spider), (rabbit, squirrel), (maple, oak), (bicycle, motorcycle).

**Table 1:** Sample composition for CIFAR-10/CIFAR-100 [7] dominant noise.

| CIFAR-10 [7] Dominant Noise  |      |      |      |
|------------------------------|------|------|------|
| Noise ratio                  | 0.2  | 0.5  | 0.8  |
| Dominant class               | 2000 | 1250 | 500  |
| Recessive class              | 3000 | 3750 | 4500 |
| CIFAR-100 [7] Dominant Noise |      |      |      |
| Noise ratio                  | 0.2  | 0.5  | 0.8  |
| Dominant class               | 200  | 125  | 50   |
| Recessive class              | 300  | 375  | 450  |

## 2.2 Cell dataset BBBC036 [1]

For our experiments, we subsampled 100 treatments to evaluate natural noise. Table 2 shows the treatment list. ("NA" refers to the *control* group, *i.e.* no treatment group.)

**Table 2:** Treatments used from the BBBC036 dataset [1]

|               |               |               |               |               |
|---------------|---------------|---------------|---------------|---------------|
| NA            | BRD-K88090157 | BRD-K38436528 | BRD-K07691486 | BRD-K97530723 |
| BRD-A32505112 | BRD-K21853356 | BRD-K96809896 | BRD-A82590476 | BRD-A95939040 |
| BRD-A53952395 | BRD-A64125466 | BRD-A99177642 | BRD-K90574421 | BRD-K07507905 |
| BRD-K62221994 | BRD-K62810658 | BRD-K47150025 | BRD-K17705806 | BRD-K85015012 |
| BRD-K37865504 | BRD-A52660433 | BRD-K66898851 | BRD-K15025317 | BRD-K37392901 |
| BRD-K91370081 | BRD-K39484304 | BRD-K03842655 | BRD-K76840893 | BRD-K62289640 |
| BRD-K14618467 | BRD-K52313696 | BRD-K43744935 | BRD-K86727142 | BRD-K21680192 |
| BRD-K06426971 | BRD-K24132293 | BRD-K68143200 | BRD-K08554278 | BRD-K78122587 |
| BRD-A47513740 | BRD-K18619710 | BRD-A67552019 | BRD-K17140735 | BRD-K30867024 |
| BRD-K36007650 | BRD-K51318897 | BRD-K90382497 | BRD-K00259736 | BRD-K95435023 |
| BRD-K52075040 | BRD-K03642198 | BRD-K47278471 | BRD-K17896185 | BRD-K95603879 |
| BRD-A70649075 | BRD-K02407574 | BRD-A90462498 | BRD-K67860401 | BRD-A64485570 |
| BRD-K88429204 | BRD-A49046702 | BRD-K50841342 | BRD-K35960502 | BRD-K77171813 |
| BRD-K54095730 | BRD-K93754473 | BRD-K22134346 | BRD-K72703948 | BRD-K31342827 |
| BRD-K31542390 | BRD-K18250272 | BRD-K00141480 | BRD-K37991163 | BRD-K13533483 |
| BRD-K67439147 | BRD-A91008255 | BRD-K39187410 | BRD-K26997899 | BRD-K89732114 |
| BRD-K50135270 | BRD-K95237249 | BRD-K44849676 | BRD-K20742498 | BRD-K31912990 |
| BRD-K96799727 | BRD-K09255212 | BRD-A89947015 | BRD-K78364995 | BRD-K49294207 |
| BRD-K08316444 | BRD-K89930444 | BRD-K50398167 | BRD-K47936004 | BRD-A72711497 |
| BRD-A97104540 | BRD-A50737080 | BRD-K80970344 | BRD-K50464341 | BRD-K97399794 |

## 2.3 Cell dataset CHAMMI-CP [2]

Three compounds with a *control* group are selected for our experiments: BRD-A29260609 (weak reaction), BRD-K04185004 (medium reaction), and BRD-K21680192 (strong reaction).

## 2.4 Clothing1M dataset [15]

We conducted experiments on the Clothing1M dataset [4], the noise source knowledge is summarized according to the confusion matrix from the dataset [4]. We use  $a \rightarrow b$  to represent  $a$  as the noise source of  $b$ . The prior noise knowledge is: *Chiffon*  $\rightarrow$  *Shirt*, *Sweater*  $\rightarrow$  *Knitwear*, *Knitwear*  $\rightarrow$  *Sweater*, *Jacket*  $\rightarrow$  *Windbreaker*, *Windbreaker*  $\rightarrow$  *Down coat*, and *Vest*  $\rightarrow$  *Dress*.

## 3 Feature extractors for each dataset

We used a pre-trained ResNet34 [3] on CIFAR-10/CIFAR-100 [7] for all approaches (UNICON [5] trains on two networks), ResNet50 [3] on Animal-10N [12] and Clothing1M [15] datasets. For experiments on BBBC036 [1] we used an Efficient B0 [13] for all methods and all methods used ConvNet [10] for CHAMMI-CP [2] dataset. To support the 5 channel images in cell datasets, we replaced the first convolutional layer in the network to support the new image dimensions.

## 4 Hyperparameters

For a fair comparison, we use the same hyperparameter settings as in prior work [5, 6, 8, 11, 14] for CIFAR-10/CIFAR-100 [7] datasets. Hyperparameters of the cell dataset BBBC036 [1] were set via grid search using the validation set. All the experiments use the same batch size of 128. "fl-ratio" of CRUST [11] and CRUST<sup>+k</sup>, which controls the size of selected clean samples is set as the same as the noise ratio in synthesized noise and set as 0.6 in cell dataset BBBC036 [1] and CHAMMI-CP [2], 0.9 in Animal10N [12] and Clothing1M [15]. All the other hyperparameters for each dataset are summarized in Table 3.

**Table 3:** Hyperparameters for each dataset.

|                        | learning rate | warm-up epochs | total number of epochs |
|------------------------|---------------|----------------|------------------------|
| CIFAR-10/CIFAR-100 [7] | 1e-2          | 40             | 120                    |
| BBBC036 [1]            | 2e-4          | 10             | 100                    |
| CHAMMI-CP [2]          | 2e-4          | 5              | 30                     |
| Animal10N [12]         | 5e-3          | 3              | 30                     |
| Clothing1M [15]        | 5e-2          | 0              | 200                    |

## 5 Additional results on lower noise ratio of dominant noise

We also performed experiments with 0.2 dominant noise on CIFAR-10/CIFAR-100 [7] datasets. The results in Table 4 demonstrate that knowledge integration is also beneficial in cases of lower noise ratios, showcasing the broad applicability of LNL+K across a range of noise levels from 0.2 to 0.8.

**Table 4:** 0.2 Dominant noise results on CIFAR-10 and CIFAR-100 dataset. The best test accuracy is marked in bold, and the better result between LNL and LNL+K methods is marked with underlined. We find incorporating source knowledge helps in almost all cases.

|                      | CIFAR-10 [7]             | CIFAR-100 [7]            |
|----------------------|--------------------------|--------------------------|
| Baseline             | 85.47±0.52               | 50.37±0.45               |
| DualT [16]           | 86.55±0.06               | 34.88±0.11               |
| GT-T                 | 88.09±0.04               | 59.32±0.14               |
| SOP [9]              | 89.86±0.40               | 62.47±0.47               |
| CRUST [11]           | 88.21±0.22               | 53.48±0.80               |
| CRUST <sup>+k</sup>  | <u>89.53±0.05</u>        | <u>58.69±0.50</u>        |
| FINE [6]             | 86.23±0.30               | 53.68±1.54               |
| FINE <sup>+k</sup>   | <u>88.69±0.06</u>        | <u>57.22±1.16</u>        |
| SFT [14]             | 89.48±0.21               | 51.82±0.67               |
| SFT <sup>+k</sup>    | <u>89.78±0.03</u>        | <u>54.36±0.48</u>        |
| UNICON [5]           | 90.82±0.14               | 63.28±0.32               |
| UNICON <sup>+k</sup> | <u>90.83±0.11</u>        | <u>66.77±0.54</u>        |
| DISC [8]             | 93.10±0.12               | 69.75±0.13               |
| DISC <sup>+k</sup>   | <b><u>93.55±0.03</u></b> | <b><u>70.02±0.30</u></b> |

## 6 Ethical considerations

This study was conducted with biological images of human bone osteosarcoma cells, an immortalized cell line used for research purposes only. The images or data in this study do not contain patient information of any kind. The use of these images, and the algorithms to analyze them, is to test the effects of treatments. Automating drug discovery has positive impacts on society, specifically the potential to help find cures for diseases of pressing need around the world in shorter times, and utilizing fewer resources. The proposed methods could be used to optimize drugs that harm people; we do not intend that as an application, and we expect regulations in biological labs to prevent such uses.

## References

1. Bray, M.A., Singh, S., Han, H., Davis, C.T., Borgeson, B., Hartland, C., Kost-Alimova, M., Gustafsdottir, S.M., Gibson, C.C., Carpenter, A.E.: Cell painting, a high-content image-based assay for morphological profiling using multiplexed fluorescent dyes. *Nature protocols* **11**(9), 1757–1774 (2016)
2. Chen, Z., Pham, C., Wang, S., Doron, M., Moshkov, N., Plummer, B.A., Caicedo, J.C.: Chammi: A benchmark for channel-adaptive models in microscopy imaging. arXiv preprint arXiv:2310.19224 (2023)



3. He, K., Zhang, X., Ren, S., Sun, J.: Deep residual learning for image recognition. In: Proceedings of the IEEE conference on computer vision and pattern recognition. pp. 770–778 (2016)
4. Kaneko, T., Ushiku, Y., Harada, T.: Label-noise robust generative adversarial networks. In: Proceedings of the IEEE/CVF Conference on Computer Vision and Pattern Recognition. pp. 2467–2476 (2019)
5. Karim, N., Rizve, M.N., Rahnavard, N., Mian, A., Shah, M.: Unicon: Combating label noise through uniform selection and contrastive learning. In: Proceedings of the IEEE/CVF Conference on Computer Vision and Pattern Recognition. pp. 9676–9686 (2022)
6. Kim, T., Ko, J., Choi, J., Yun, S.Y., et al.: Fine samples for learning with noisy labels. *Advances in Neural Information Processing Systems* **34**, 24137–24149 (2021)
7. Krizhevsky, A., Hinton, G., et al.: Learning multiple layers of features from tiny images (2009)
8. Li, Y., Han, H., Shan, S., Chen, X.: Disc: Learning from noisy labels via dynamic instance-specific selection and correction. In: Proceedings of the IEEE/CVF Conference on Computer Vision and Pattern Recognition. pp. 24070–24079 (2023)
9. Liu, S., Zhu, Z., Qu, Q., You, C.: Robust training under label noise by over-parameterization. In: Proceedings of the 39th International Conference on Machine Learning (2022)
10. Liu, Z., Mao, H., Wu, C.Y., Feichtenhofer, C., Darrell, T., Xie, S.: A convnet for the 2020s. In: Proceedings of the IEEE/CVF conference on computer vision and pattern recognition. pp. 11976–11986 (2022)
11. Mirzasoleiman, B., Cao, K., Leskovec, J.: Coresets for robust training of deep neural networks against noisy labels. *Advances in Neural Information Processing Systems* **33**, 11465–11477 (2020)
12. Song, H., Kim, M., Lee, J.G.: Selfie: Refurbishing unclean samples for robust deep learning. In: International Conference on Machine Learning. pp. 5907–5915. PMLR (2019)
13. Tan, M., Le, Q.: Efficientnet: Rethinking model scaling for convolutional neural networks. In: International conference on machine learning. pp. 6105–6114. PMLR (2019)
14. Wei, Q., Sun, H., Lu, X., Yin, Y.: Self-filtering: A noise-aware sample selection for label noise with confidence penalization. In: *Computer Vision—ECCV 2022: 17th European Conference, Tel Aviv, Israel, October 23–27, 2022, Proceedings, Part XXX*. pp. 516–532. Springer (2022)
15. Xiao, T., Xia, T., Yang, Y., Huang, C., Wang, X.: Learning from massive noisy labeled data for image classification. In: Proceedings of the IEEE conference on computer vision and pattern recognition. pp. 2691–2699 (2015)
16. Yao, Y., Liu, T., Han, B., Gong, M., Deng, J., Niu, G., Sugiyama, M.: Dual t: Reducing estimation error for transition matrix in label-noise learning. *Advances in neural information processing systems* **33**, 7260–7271 (2020)
